# Supplementary material for: Effect of the Zr promoter on precipitated iron-based catalysts for high-temperature Fischer–Tropsch synthesis of light olefins
Source: Royal Society of Chemistry journal article supplement (doi:10.1039/d2cy00146b), 2022-01-01
Supplement: d2cy00146b1.pdf [file d2cy00146b1.pdf]

## Supporting information

### Effect of Zr Promoter on Precipitated Iron-Based Catalysts for High-Temperature Fischer-Tropsch Synthesis of Light Olefins

*Yi Yang,<sup>a</sup> Weixin Qian,<sup>a</sup> Haitao Zhang,<sup>a</sup> Zhonghao Han,<sup>a</sup> Hongfang Ma,<sup>\*a</sup> Qiwen Sun,<sup>b</sup> and  
Weiyong Ying<sup>a</sup>*

<sup>a</sup> Engineering Research Center of Large Scale Reactor Engineering and Technology, Ministry of Education, State Key Laboratory of Chemical Engineering, School of chemical engineering, East China University of Science and Technology, Shanghai 200237, China.

<sup>b</sup> State Key Laboratory of Coal Liquefaction and Coal Chemical Technology, Shanghai 201203, China

**\* Corresponding Author**

E-mail: mark@ecust.edu.cn

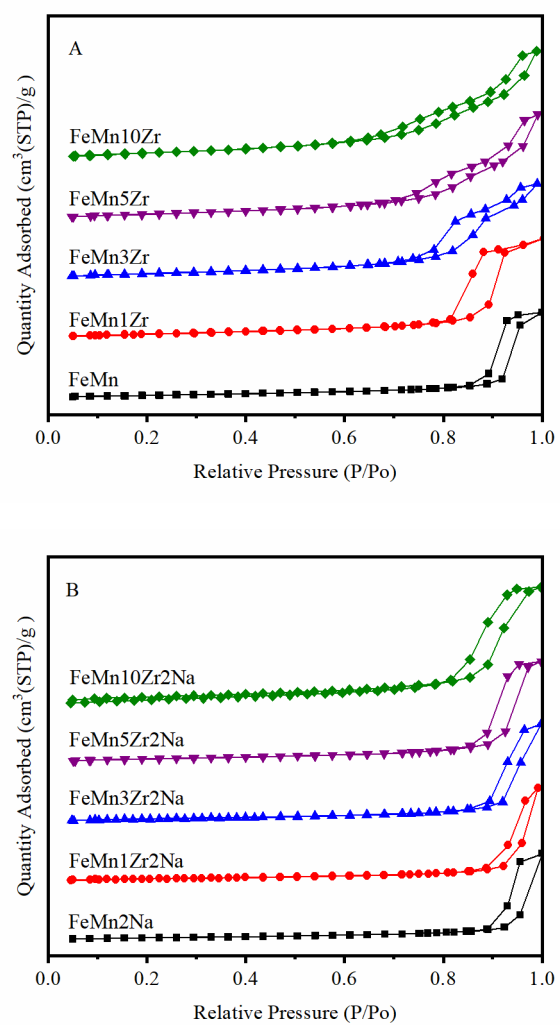

**Figure S1.** Ar-physisorption isotherms of (A) FeMnxZr catalysts, (B) FeMnxZr<sub>2</sub>Na catalysts.

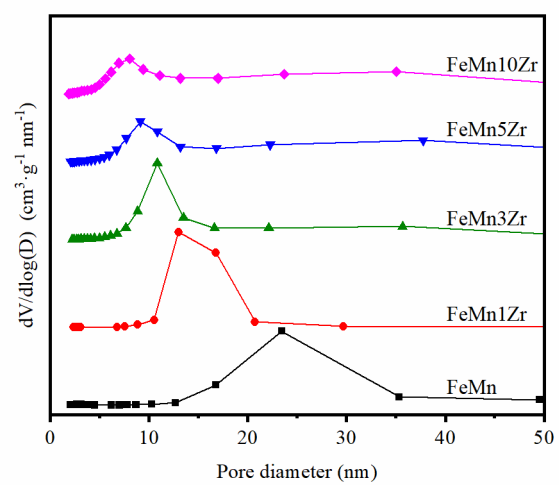

**Figure S2.** Pore diameter distributions of the fresh FeMnxZr catalysts

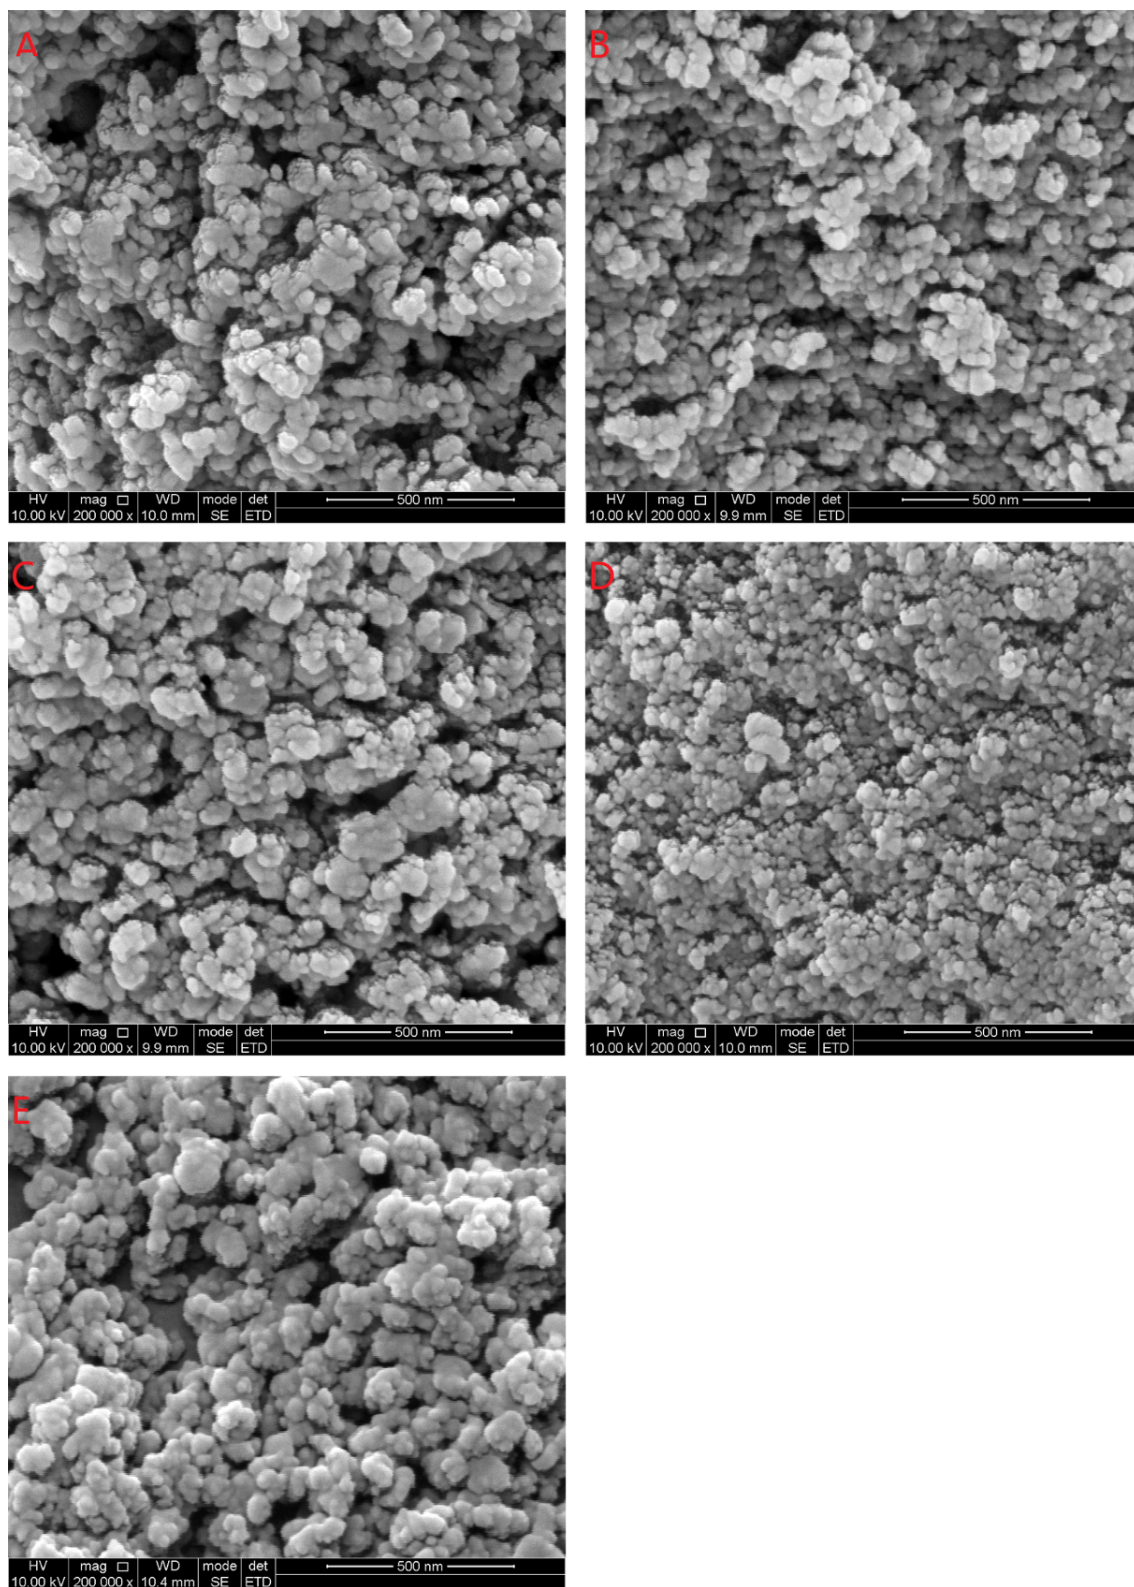

**Figure S3.** SEM images of fresh catalysts (A) FeMn, (B) FeMn1Zr, (C) FeMn3Zr, (D) FeMn5Zr, (E) FeMn10Zr.

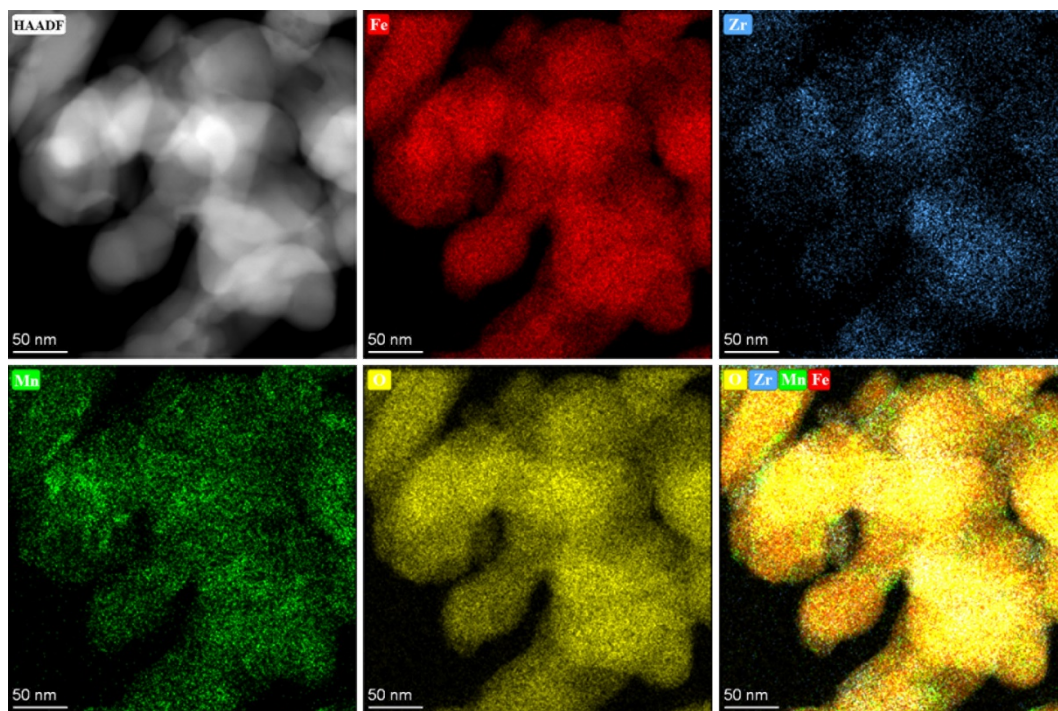

**Figure S4.** HAADF-STEM and corresponding EDS-mapping images of fresh FeMn5Zr catalyst.

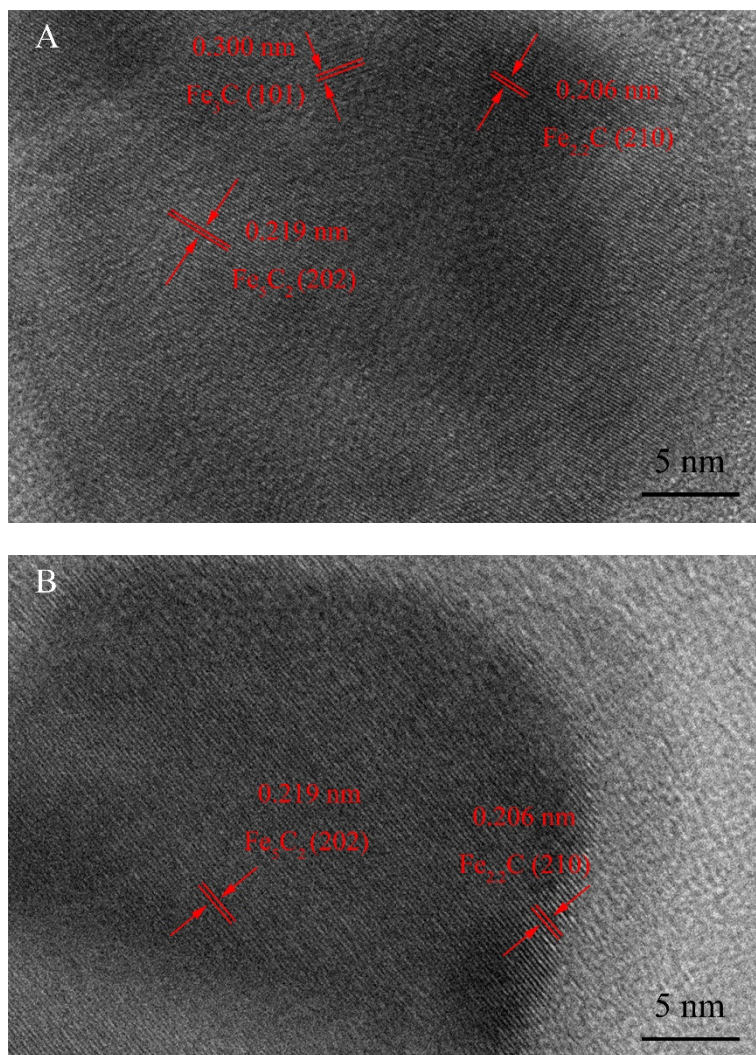

**Figure S5.** HRTEM images of spent catalysts (A) FeMn2Na, (B) FeMn5Zr2Na.

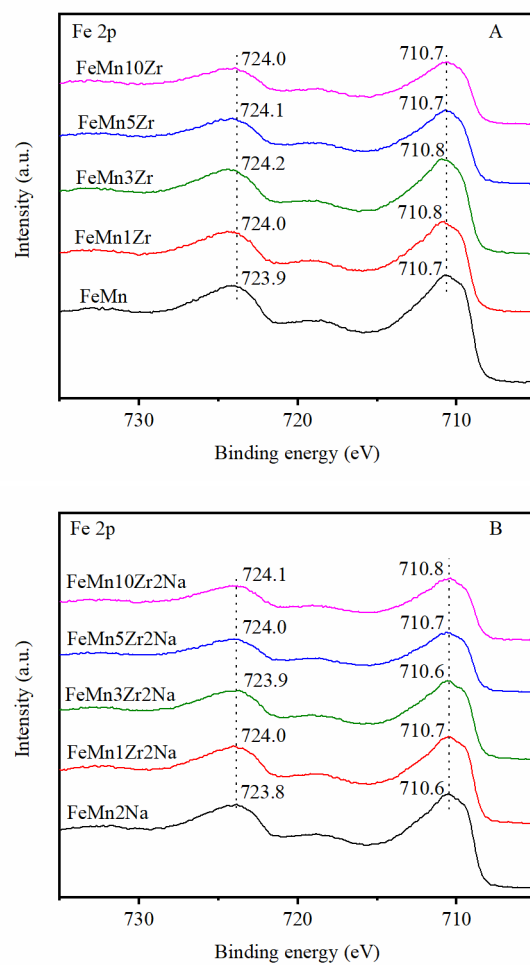

**Figure S6.** XPS spectra of the fresh catalysts (A) Fe 2p XPS spectra of FeMnxZr catalysts, (B) Fe 2p XPS spectra of FeMnxZr2Na catalysts.

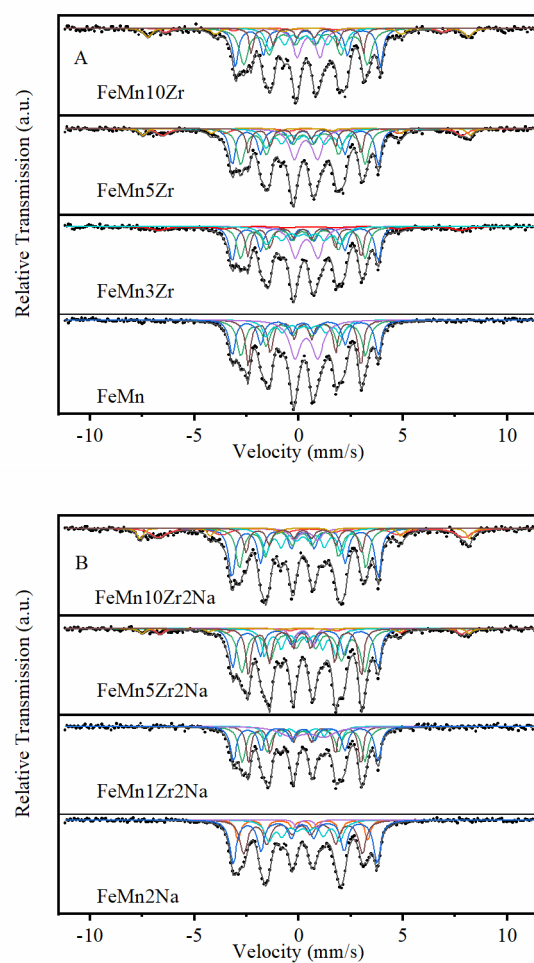

**Figure S7.** Mössbauer spectra of the spent catalysts (A) FeMnxZr catalysts, (B) FeMnxZr<sub>2</sub>Na catalysts.

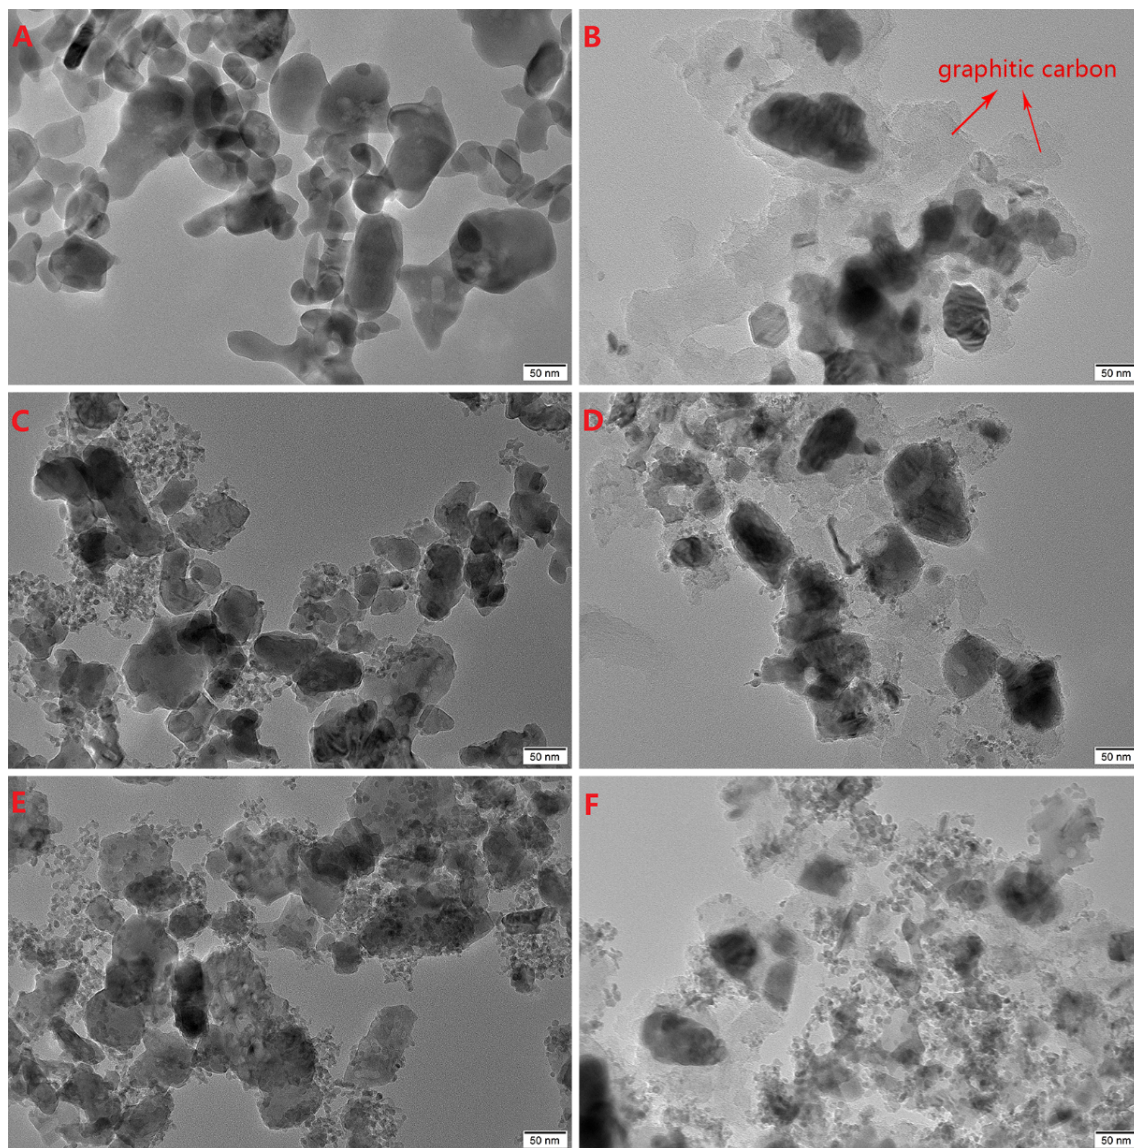

**Figure S8.** TEM images of (A) fresh FeMn<sub>2</sub>Na catalyst, (B) spent FeMn<sub>2</sub>Na catalyst, (C) fresh FeMn<sub>5</sub>Zr<sub>2</sub>Na catalyst, (D) spent FeMn<sub>5</sub>Zr<sub>2</sub>Na catalyst, (E) fresh FeMn<sub>10</sub>Zr<sub>2</sub>Na catalyst, (F) spent FeMn<sub>10</sub>Zr<sub>2</sub>Na catalyst.
